# Supplementary material for: The role of sodium chloride in the sensory and physico-chemical properties of sweet biscuits
Source: PubMed Central journal article supplement — Food Chem X. 2021 Jan 7;9:100115. doi: 10.1016/j.fochx.2021.100115 (PMC7817490; doi:10.1016/j.fochx.2021.100115), 2021-01-07
Supplement: mmc1.pdf [file mmc1.pdf]

**Table S1.** Instrumental colour measurement of each biscuit was determined with the Colour Quest XE (Hunter Lab, U.K.) (13 replicates). The colour reading includes lightness (L\*), a\* which varies from green (negative) to red (positive) and b\* which corresponds to a yellow-blue scale on which yellow is positive. The total colour difference ( $\Delta E^*$ ) from a reference colour (L3) to a target colour in the CIELAB space.

|         | L        | a        | b        | $\Delta E$ |
|---------|----------|----------|----------|------------|
| L0      | 55.4±0.6 | 9.9±0.4  | 23.2±0.4 | 0.8±0.3    |
| L1      | 55.4±0.6 | 10.2±0.4 | 23.4±0.3 | 0.8±0.3    |
| L2      | 55.1±0.6 | 10.4±0.4 | 23.2±0.3 | 0.9±0.2    |
| L3      | 54.7±0.8 | 10.1±0.6 | 23.2±0.3 | Ref        |
| p-value | 0.063    | 0.089    | 0.289    | 0.955      |

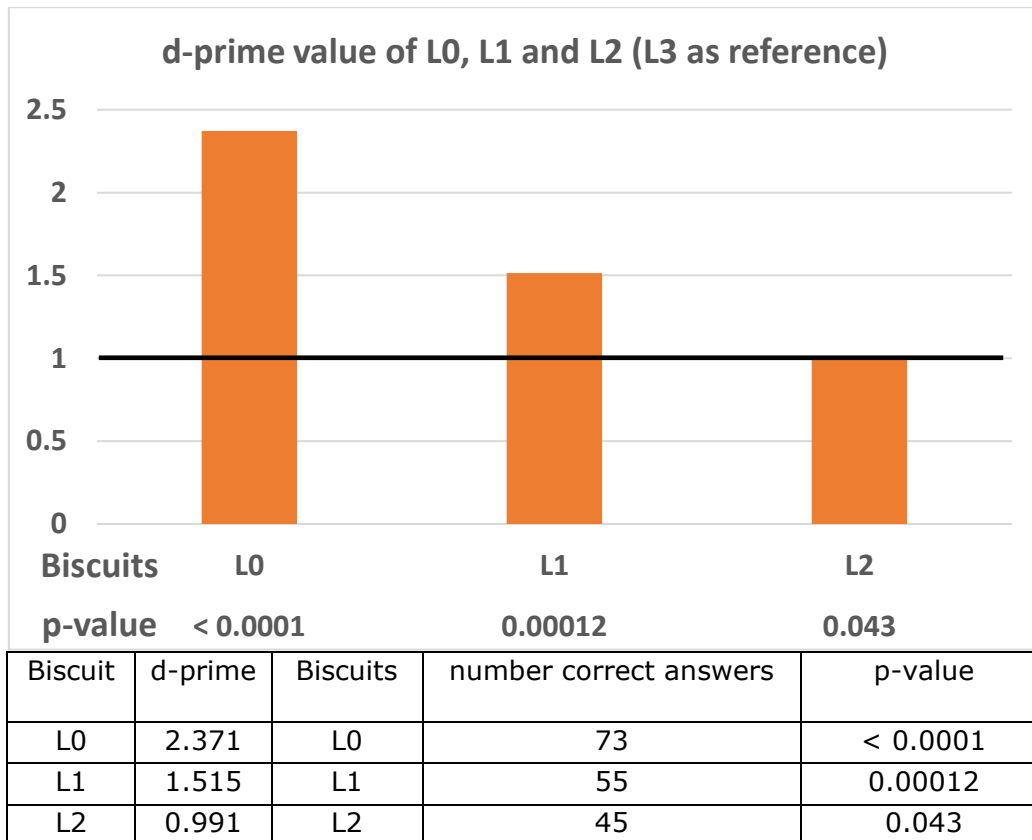

**Figure S1.** Bar chart representing the sensory distance between two samples (one unit represents a standard deviation). A Thurstonian model, was used to compare the panellist answers  $d'$  (d-prime). It is based on the results obtained during triangle-sensory tests. If  $d'$  is below 1, then products cannot be discriminated. It shows that a reduction of 33% (L2) or above (L0 & L1) of added salt from the reference biscuits (L3) is significantly perceived. The greater the reduction of added salt, the greater the consumers perceive it significantly different.
